# Supplementary material
Source: ML conference proceedings conference paper supplement (https://openreview.net/forum?id=7NR2ZVzZxx)
Supplement: supplementary_material [file attachment]

---

# LogicBench: A Benchmark for Evaluation of Logical Reasoning (Supplementary Material)

---

Anonymous Author(s)

## 1 A Example Prompt for Sentence Generation

2 Figure 1 illustrates an example prompt for the  
3 inference rule, namely, ‘modus tollens’ from  
4 propositional logic (PL). Modus tollens is for-  
5 mally represented as  $((p \rightarrow q) \wedge \neg q) \vdash \neg p$ ,  
6 which can be understood in natural language as  
7 “If  $p$  implies  $q$ , and we know  $\neg q$ , then we can  
8 conclude  $\neg p$ .” In this prompt, the definition pro-  
9 vides a comprehensive description of the infer-  
10 ence rule in natural language. To encourage the  
11 generation of more relevant and coherent sen-  
12 tences, the prompt includes an examples section  
13 that demonstrates how the generated sentences  
14 will be utilized in a later stage. This serves, as  
15 an illustration, to guide GPT-3 in producing suit-  
16 able outputs. In Figure 1, we present three ex-  
17 amples involving sentences  $p$  and  $q$ , along with  
18 their respective contexts and questions. The  
19 prompt also includes instructions on how the  
20 generated sentences should be formatted.

## 21 B Examples of Data Instances

22 This section provides examples of (*context, ques-*  
23 *tion, answer*) tuples corresponding to each infer-  
24 ence rule and reasoning pattern. Additionally,  
25 it highlights the diverse range of question vari-  
26 ations within the dataset associated with each  
27 inference rule and reasoning pattern.

### 28 B.1 Word Cloud

29 Figure 2 provides a word cloud derived from  
30 the *LogicBench(Eval)*. This word cloud high-  
31 lights the logical nature and diversity of our eval-  
32 uation dataset. Words such as ‘if’, ‘normally’,  
33 ‘usually’, and ‘then’ are prominently featured,  
34 suggesting their frequent use in the dataset, and

**Definition**

*If  $p$  then  $q$ ; not  $q$ , therefore not  $p$*   
Understand the below examples to learn the connection between sentences and how they have been used. Use that understanding to generate coherent sentences.

**Examples**

**p:** Liam finished his work early.  
**q:** He will order pizza for dinner.  
**Context:** If Liam finished his work early, then he will order pizza for dinner.  
**Question:** If he won't order pizza for dinner, does this imply that Liam didn't finish his work early?  
**Answer:** yes

**p:** Lisa gets an A in the class.  
**q:** She will reward herself with a trip.  
**Context:** If Lisa gets an A in the class, then she will reward herself with a trip.  
**Question:** If she won't reward herself with a trip, does this imply that Lisa gets A in the class?  
**Answer:** no

**p:** Benjamin is going to the beach.  
**q:** He will go swimming.  
**Context:** If Benjamin is going to the beach, then he will go swimming.  
**Question:** If he won't go swimming, does this imply that Benjamin isn't going to the beach?  
**Answer:** yes

**Instruction for Formatting**

1. Generate only one pair of  $p$  and  $q$  based on the above understanding.
2. Generate each sentence in a new line.
3. Do not generate prefixes for  $p$  and  $q$ .

Figure 1: Example prompt for *Modus Tollens* inference rule from PL.



## 63 B.4 Non-Monotonic (NM) Reasoning

64 Here, we discuss examples of each reasoning pattern present in the NM reasoning from the *LogicBench* as shown in Table 3. Table 3 has context related to the reasoning pattern and different variants  
65 of the question. For example, the first row of Table 3 shows the example for *Default Reasoning*  
66 *with Irrelevant Information (DRI)*. For this reasoning, based on the given context, there are also two  
67 possible variations of the question where one with a correct conclusion labeled as *Yes* and another  
68 with an incorrect conclusion labeled as *No*.  
69

| Rules | Context                                                                                                                                                                                                                                                                                                                                   | Question                                                                                                                                                                                                                                                                                                                                                                                                                                                                    |
|-------|-------------------------------------------------------------------------------------------------------------------------------------------------------------------------------------------------------------------------------------------------------------------------------------------------------------------------------------------|-----------------------------------------------------------------------------------------------------------------------------------------------------------------------------------------------------------------------------------------------------------------------------------------------------------------------------------------------------------------------------------------------------------------------------------------------------------------------------|
| HS    | If Jim cleaned his room, then he will get a reward. If he will get a reward, then he will buy a new toy.                                                                                                                                                                                                                                  | <b>Q1:</b> If Jim cleaned his room, does this imply that he will buy a new toy? (Yes)<br><b>Q2:</b> If Jim didn't clean his room, does this entail that he won't buy a new toy? (No)<br><b>Q3:</b> If Jim cleaned his room, does this imply that he won't buy a new toy? (No)<br><b>Q4:</b> If Jim didn't clean his room, does this imply that he will buy a new toy? (No)                                                                                                  |
| DS    | We know that at least one of the following is true (1) Chloe is studying for her exams and (2) Mila is going on vacation. Note that we do not know which ones of (1) and (2) are true. It might be the case that only (1) is true, or only (2) is true or both are true.                                                                  | <b>Q1:</b> If Chloe isn't studying for her exams, does this entail that Mila is going on vacation? (Yes)<br><b>Q2:</b> If Chloe isn't studying for her exams, does this mean that Mila isn't going on vacation? (No)<br><b>Q3:</b> If Chloe is studying for her exams, does this imply that Mila isn't going on vacation? (No)<br><b>Q4:</b> If Chloe is studying for her exams, does this imply that Mila is going on vacation? (No)                                       |
| CD    | If I go for a walk, then I will get some fresh air. If I stay home, then I will watch a movie. We know that at least one of the following is true (1) I go for a walk and (2) I stay home. Note that we do not know which ones of (1) and (2) are true. It might be the case that only (1) is true, or only (2) is true or both are true. | If at least one of (1) and (2) is true, can we say, at least one of the following must always be true?<br><b>Q1:</b> (a) I will get some fresh air and (b) I will watch a movie (Yes)<br><b>Q2:</b> (a) I won't get some fresh air and (b) I will watch a movie (No)<br><b>Q3:</b> (a) I will get some fresh air and (b) I won't watch a movie (No)<br><b>Q4:</b> (a) I won't get some fresh air and (b) I won't watch a movie (No)                                         |
| DD    | If I order takeout, then I will save time. If I cook a meal, then I will save money. We know that at least one of the following is true (1) I won't save time and (2) I won't save money. Note that we do not know which ones of (1) and (2) are true. It might be the case that only (1) is true, or only (2) is true or both are true.  | If at least one of (1) and (2) is true, can we say, at least one of the following must always be true?<br><b>Q1:</b> (a) I don't order takeout and (b) I don't cook a meal (Yes)<br><b>Q2:</b> (a) I order takeout and (b) I cook a meal (No)<br><b>Q3:</b> (a) I don't order takeout and (b) I cook a meal (No)<br><b>Q4:</b> (a) I order takeout and (b) I don't cook a meal (No)                                                                                         |
| BD    | If it rains, then we will stay inside. If it is sunny, then we will go for a walk. We know that at least one of the following is true (1) it rains and (2) we will not go for a walk. Note that we do not know which ones of (1) and (2) are true. It might be the case that only (1) is true, or only (2) is true or both are true.      | If at least one of (1) and (2) is true, can we say, at least one of the following must always be true?<br><b>Q1:</b> (a) We will stay inside and (b) it is not sunny (Yes)<br><b>Q2:</b> (a) We will not stay inside and (b) it is sunny (No)<br><b>Q3:</b> (a) We will stay inside and (b) it is sunny (No)<br><b>Q4:</b> (a) We will not stay inside and (b) it is not sunny (No)                                                                                         |
| MT    | If Mason left his job, then he will not receive any salary.                                                                                                                                                                                                                                                                               | <b>Q1:</b> If he will receive any salary, does this mean that Mason didn't leave his job? (Yes)<br><b>Q2:</b> If he will receive any salary, does this mean that Mason left his job? (No)<br><b>Q3:</b> If he will not receive any salary, does this imply that Mason didn't leave his job? (No)<br><b>Q4:</b> If he will not receive any salary, does this mean that Mason left his job? (No)                                                                              |
| MI    | If Rohan forgot his lunch, then he will not eat at school.                                                                                                                                                                                                                                                                                | Based on context, can we say, at least one of the following must always be true?<br><b>Q1:</b> (a) Rohan didn't forget his lunch and (b) he will not eat at school (Yes)<br><b>Q2:</b> (a) Rohan forgot his lunch and (b) he will eat at school (No)<br><b>Q3:</b> (a) Rohan forgot his lunch and (b) he will not eat at school (No)<br><b>Q4:</b> (a) Rohan didn't forget his lunch and (b) he will eat at school (No)                                                     |
| CT    | We know that at least one of the following is true (1) Tom is an avid reader and (2) he devours books of all genres. Note that we do not know which ones of (1) and (2) are true. It might be the case that only (1) is true, or only (2) is true or both are true.                                                                       | If at least one of (1) and (2) is true, can we say, at least one of the following must always be true?<br><b>Q1:</b> (a) He devours books of all genres and (b) Tom is an avid reader (Yes)<br><b>Q2:</b> (a) He doesn't devour books of all genres and (b) Tom is an avid reader (No)<br><b>Q3:</b> (a) He devours books of all genres and (b) Tom isn't an avid reader (No)<br><b>Q4:</b> (a) He doesn't devour books of all genres and (b) Tom isn't an avid reader (No) |

Table 1: Examples of context and question-answer pairs for each inference rule of PL. (Yes) and (No) indicates the answer to the given question. HS: Hypothetical Syllogism, DS: Disjunctive Syllogism, CD: Constructive Dilemma, DD: Destructive Dilemma, BD: Bidirectional Dilemma, MT: Modus Tollens, MI: Material Implication, CT: Commutation

## 70 C Examples of NL Conversion

71 This section illustrates the way natural language logical context and questions are created using the  
72 generated sentence in Stage 1. Table 4 shows examples of how context and question are generated  
73 from sentences corresponding to each inference rule for PL and FOL. Similarly, Table 5 shows  
74 examples of NM reasoning. From Table 4, we can see an example of sentence pairs  $(p, q)$  and their

| Rules | Context                                                                                                                                                                                                                                                                                                                                                                                                                        | Question                                                                                                                                                                                                                                                                                                                                                                                                                                                                                                                        |
|-------|--------------------------------------------------------------------------------------------------------------------------------------------------------------------------------------------------------------------------------------------------------------------------------------------------------------------------------------------------------------------------------------------------------------------------------|---------------------------------------------------------------------------------------------------------------------------------------------------------------------------------------------------------------------------------------------------------------------------------------------------------------------------------------------------------------------------------------------------------------------------------------------------------------------------------------------------------------------------------|
| UI    | All students need to take an exam to complete their degree. Reema is a student.                                                                                                                                                                                                                                                                                                                                                | <b>Q1:</b> Does Reema need to take an exam to complete her degree? (Yes)<br><b>Q2:</b> Does Reema need not to take an exam to complete her degree? (No)                                                                                                                                                                                                                                                                                                                                                                         |
| EI    | James won the marathon race.                                                                                                                                                                                                                                                                                                                                                                                                   | <b>Q1:</b> Does this imply that someone won the marathon race? (Yes)<br><b>Q2:</b> Does this mean that no one won the marathon race? (No)                                                                                                                                                                                                                                                                                                                                                                                       |
| MP    | If someone is exhausted, then they will take a rest.                                                                                                                                                                                                                                                                                                                                                                           | <b>Q1:</b> If Jack is exhausted, does this entail that he will take a rest? (Yes)<br><b>Q2:</b> If Jack isn't exhausted, does this imply that he won't take a rest? (No)<br><b>Q3:</b> If Jack is exhausted, does this entail that he won't take a rest? (No)<br><b>Q4:</b> If Jack isn't exhausted, does this entail that he will take a rest? (No)                                                                                                                                                                            |
| HS    | If someone buys all the necessary supplies, then they can start the project. If they can start the project, then they will finish it on time.                                                                                                                                                                                                                                                                                  | <b>Q1:</b> If Lily bought all the necessary supplies, does this mean that she will finish it on time? (Yes)<br><b>Q2:</b> If Lily didn't buy all the necessary supplies, does this imply that she won't finish it on time? (No)<br><b>Q3:</b> If Lily bought all the necessary supplies, does this entail that she won't finish it on time? (No)<br><b>Q4:</b> If Lily didn't buy all the necessary supplies, does this imply that she will finish it on time? (No)                                                             |
| DS    | We know that at least one of the following is true (1) they can go to a museum and (2) they can visit a park. Note that we do not know which ones of (1) and (2) are true. It might be the case that only (1) is true, or only (2) is true or both are true.                                                                                                                                                                   | <b>Q1:</b> If Jill can't go to a museum, does this imply that she can visit a park? (Yes)<br><b>Q2:</b> If Lily can't go to a museum, does this entail that she can't visit a park? (No)<br><b>Q3:</b> If Jill can go to a museum, does this entail that she can't visit a park? (No)<br><b>Q4:</b> If Jill can go to a museum, does this imply that she can visit a park? (No)                                                                                                                                                 |
| CD    | If someone is painting a picture, then they will frame it. If they are writing a story, then they will publish it. We know that at least one of the following is true (1) John is painting a picture. and (2) She is writing a story. Note that we do not know which ones of (1) and (2) are true. It might be the case that only (1) is true, or only (2) is true or both are true.                                           | If at least one of (1) and (2) is true, can we say, at least one of the following must always be true?<br><b>Q1:</b> (a) He will frame it and (b) She will publish it (Yes)<br><b>Q2:</b> (a) He won't frame it and (b) She will publish it (No)<br><b>Q3:</b> (a) He will frame it and (b) She won't publish it (No)<br><b>Q4:</b> (a) He won't frame it and (b) She won't publish it (No)                                                                                                                                     |
| DD    | If someone takes care of her health, then they will be fit and healthy. If they indulge in unhealthy habits, then they will be prone to diseases. We know that at least one of the following is true (1) Jenny won't be fit and healthy and (2) she won't be prone to diseases. Note that we do not know which ones of (1) and (2) are true. It might be the case that only (1) is true, or only (2) is true or both are true. | If at least one of (1) and (2) is true, can we say, at least one of the following must always be true?<br><b>Q1:</b> (a) Jenny doesn't take care of her health and (b) she doesn't indulge in unhealthy habits (Yes)<br><b>Q2:</b> (a) Jenny takes care of her health and (b) she indulges in unhealthy habits (No)<br><b>Q3:</b> (a) Jenny doesn't take care of her health and (b) she indulges in unhealthy habits (No)<br><b>Q4:</b> (a) Jenny takes care of her health and (b) she doesn't indulge in unhealthy habits (No) |
| BD    | If someone drinks lots of water, then they will feel hydrated. If they eat too much sugar, then they will experience a sugar crash. We know that at least one of the following is true (1) Jane drinks lots of water and (2) she won't experience a sugar crash. Note that we do not know which ones of (1) and (2) are true. It might be the case that only (1) is true, or only (2) is true or both are true.                | If at least one of (1) and (2) is true, can we say, at least one of the following must always be true?<br><b>Q1:</b> (a) She will feel hydrated and (b) she doesn't eat too much sugar (Yes)<br><b>Q2:</b> (a) She won't feel hydrated and (b) she eats too much sugar (No)<br><b>Q3:</b> (a) She will feel hydrated and (b) she eats too much sugar (No)<br><b>Q4:</b> (a) She won't feel hydrated and (b) she doesn't eat too much sugar (No)                                                                                 |
| MT    | If someone visits the park, then they have to wear a mask.                                                                                                                                                                                                                                                                                                                                                                     | <b>Q1:</b> If he doesn't have to wear a mask, does this imply that John doesn't visit the park? (Yes)<br><b>Q2:</b> If he doesn't have to wear a mask, does this entail that John visits the park? (No)<br><b>Q3:</b> If he has to wear a mask, does this imply that John doesn't visit the park? (No)<br><b>Q4:</b> If he has to wear a mask, does this imply that John visits the park? (No)                                                                                                                                  |

Table 2: Examples of context and question-answer pairs for each inference rule and axiom of FOL. (Yes) and (No) indicates the answer to the given question. EI: Existential Instantiation, UI: Universal Instantiation, MP: Modus Ponens

| Patterns | Context                                                                                                                                                            | Question                                                                                                                                                                                                                                                                                                                                                                                                                                                                                                                                                                                                                             |
|----------|--------------------------------------------------------------------------------------------------------------------------------------------------------------------|--------------------------------------------------------------------------------------------------------------------------------------------------------------------------------------------------------------------------------------------------------------------------------------------------------------------------------------------------------------------------------------------------------------------------------------------------------------------------------------------------------------------------------------------------------------------------------------------------------------------------------------|
| DRI      | Cats and dogs are mammals. mammals typically have fur. Cats don't have fur. Dogs are loyal animals.                                                                | <b>Q1:</b> Does this imply that dogs have fur? (Yes)<br><b>Q2:</b> Does this entail that dogs don't have fur? (No)                                                                                                                                                                                                                                                                                                                                                                                                                                                                                                                   |
| DRS      | John and Mary are parents. Parents are usually loving and supportive. Parents are normally responsible. Mary isn't loving and supportive. John is not responsible. | <b>Q1:</b> Does this imply that Mary is responsible and John is loving and supportive? (Yes)<br><b>Q2:</b> Does this entail that Mary isn't responsible and John is loving and supportive? (No)<br><b>Q3:</b> Does this imply that Mary is responsible and John isn't loving and supportive? (No)<br><b>Q4:</b> Does this entail that Mary isn't responsible and John isn't loving and supportive? (No)                                                                                                                                                                                                                              |
| DRD      | Jenny and Anna are tall. Tall people usually play basketball. Anna is possibly an exception to this rule.                                                          | <b>Q1:</b> Does this entail that Jenny plays basketball? (Yes)<br><b>Q2:</b> Does this mean that Jenny doesn't play basketball? (No)                                                                                                                                                                                                                                                                                                                                                                                                                                                                                                 |
| DRO      | Hummingbirds are birds. Birds migrate south for the winter. Hummingbirds do not migrate south for the winter.                                                      | <b>Q1:</b> Does this mean that all other birds than hummingbirds migrate south for the winter? (Yes)<br><b>Q2:</b> Does this mean that all other birds than hummingbirds don't migrate south for the winter? (No)                                                                                                                                                                                                                                                                                                                                                                                                                    |
| RE1      | Cats, dogs, and horses are animals. Animals are usually considered to be intelligent creatures. At least one of the cats or dogs is not considered intelligent.    | <b>Q1:</b> Does this entail that horses are considered to be intelligent creatures and exactly one of the cats or dogs is not considered intelligent? (Yes)<br><b>Q2:</b> Does this mean that horses aren't considered to be intelligent creatures and exactly one of cats or dogs is not considered intelligent? (No)<br><b>Q3:</b> Does this mean that horses are considered to be intelligent creatures and exactly one of cats or dogs is considered intelligent? (No)<br><b>Q4:</b> Does this implies that horses aren't considered to be intelligent creatures and exactly one of cats or dogs is considered intelligent? (No) |
| RE2      | Cats normally meow. At least one species of cat doesn't meow.                                                                                                      | <b>Q1:</b> Does this entail that exactly one species of cat doesn't meow? (Yes)<br><b>Q2:</b> Does this imply that exactly one species of cat meows? (No)                                                                                                                                                                                                                                                                                                                                                                                                                                                                            |
| RE3      | Cars have four wheels. Wheels normally have spokes. At least one wheel does not have spokes.                                                                       | <b>Q1:</b> Does this imply that cars have four wheels with spokes? (Yes)<br><b>Q2:</b> Does this mean that cars don't have four wheels with spokes? (No)                                                                                                                                                                                                                                                                                                                                                                                                                                                                             |
| RAP      | John asserts that Sally was in the store. Jane asserts that Sally was not in the store.                                                                            | <b>Q1:</b> If John's evidence is more reliable than Jane's, does this mean that Sally was in the store? (Yes)<br><b>Q2:</b> If John's evidence is more reliable than Jane's, does this mean that Sally wasn't in the store? (No)<br><b>Q3:</b> If John's evidence is less reliable than Jane's, does this entail that Sally was in the store? (No)<br><b>Q4:</b> If John's evidence is less reliable than Jane's, does this imply that Sally wasn't in the store? (Yes)                                                                                                                                                              |

Table 3: Examples of context and question-answer pairs for each reasoning pattern of NM Reasoning. (Yes) and (No) indicates the answer to the given question. DRI: Default Reasoning with Irrelevant Information, DRS: Default Reasoning with Several Defaults, DRD: Default Reasoning with a Disabled Default, DRO: Default Reasoning in an Open Domain, RE1: Reasoning about Unknown Expectations I, RE2: Reasoning about Unknown Expectations II, RE3: Reasoning about Unknown Expectations III, RAP: Reasoning about Priorities

75 corresponding negation pairs ( $\neg p, \neg q$ ) for the ‘modus tollens’ inference rule from PL. These pairs  
76 are utilized to generate logical context and questions. Similarly, in the second row, we have four  
77 generic rules with variable  $x$  ( $p(x), q(x), r(x), s(x)$ ) and their specific cases (i.e.,  $x = a$ ), along with  
78 their respective negative sentence pairs [ $(p(a), \neg p(a)), (q(a), \neg q(a)), (r(a), \neg r(a)), (s(a), \neg s(a))$ ].  
79 These examples demonstrate the generation of logical context and questions for the FOL inference  
80 rule called ‘Bidirectional Dilemma (BD)’, as shown in Table 4. From Table 5, the first row presents  
81 an example of context and questions generated from a sentence pair for the ‘Default Reasoning with  
82 Irrelevant Information (DRI)’ from NM reasoning. In this specific instance, the generated sentences  
83 are  $(p, q, r, s, t)$ , and the negation is only required for the sentence  $t$ . Therefore, there is a single  
84 negation pair  $(t, \neg t)$ , which is used to generate questions specific to the ‘DRI’.

## 85 D Experimental Setup

### 86 D.1 Extended Discussion on Experiments

87 **Zero-shot setting** We evaluate GPT-3 (text-davinci-003) and ChatGPT by utilizing their APIs  
88 provided by OpenAI<sup>1</sup>. The evaluation is conducted on the versions of GPT-3 and ChatGPT released  
89 in April 2023. It’s important to note that these models are regularly updated, so when reproducing  
90 the results presented in Table 5 (main paper), there is a possibility of variations. For FLAN-T5, Tk-

<sup>1</sup><https://platform.openai.com/docs/guides/gpt>

91 instruct, and UnifiedQA, we utilize the large, 3b, and 3b versions, respectively, from the huggingface  
92 model repository<sup>2</sup>.

93 **Experiments on other logic datasets** In single and multi-task experiments on other logic datasets,  
94 we fine-tune the T5-large model for 10 epochs with a batch size of 16, 1024 maximum input length,  
95 an adaptive learning rate of  $5e - 05$ , and an AdamW optimizer for each experiment. All experiments  
96 are performed using NVIDIA RTX A6000 GPUs.

## 97 D.2 Prompts

98 All the experiments conducted in the zero-shot setting were performed using three distinct prompts.  
99 The reported results in Table 5 (main paper) represent the average performance across these prompts.  
100 The following are the three different prompts utilized in the experiments:

101 **Prompt 1** Given the context and question, respond in 'yes' or 'no'.

102 **Prompt 2** Answer the given question ONLY in 'yes' or 'no' using logical reasoning ability. DO  
103 NOT generate anything as an answer apart from 'yes' and 'no'.

104 **Prompt 3** Given context contains rules of logical reasoning in natural language. Answer the given  
105 question based on context ONLY in 'yes' or 'no' using logical reasoning ability. DO NOT generate  
106 anything as an answer apart from 'yes' and 'no'.

## 107 E Case Study on Logical Explanations

108 This section discusses the performance of the different LLMs in a Chain-of-Thought (CoT) setting  
109 on the *LogicBench(Eval)*. Here, we provide a prompt for generating logical explanations along with  
110 the final prediction. The following is the prompt provided to perform CoT:

*Given the context that contains rules of logical reasoning in natural language and question, perform  
step-by-step reasoning to answer the question. Based on context and reasoning steps answer the  
question ONLY in 'yes' or 'no'. Please use the below format:*

111 *Context: [text with logical rules]*  
*Question: [question that is based on context]*  
*Reasoning steps: [generate step-by-step reasoning]*  
*Answer: Yes/No*

112 We analyze an average performance across  $A(Yes)$  and  $A(No)$ . Table 6 shows the performance  
113 for each inference rule and reasoning pattern achieved by GPT-3, and ChatGPT. From Table 6, we  
114 can observe that GPT-3 shows a performance drop of  $\sim 8\%$ ,  $\sim 5\%$  and  $\sim 6\%$  on PL, FOL, and  
115 NM reasoning, respectively compared to zero-shot (i.e., Table 5 (main paper)). Furthermore, GPT-3  
116 shows a performance improvement of  $\sim 8\%$ , for PL and a drop of  $\sim 2\%$  and  $\sim 17\%$  on FOL, and  
117 NM reasoning, respectively.

118 This section represents a case study carried out on an inference rule of each type of logic where  
119 ChatGPT is not able to perform well. Table 7, 8, and 9 represents a case study for *Disjunctive*  
120 *Syllogism (DS)* from PL, *Destructive Dilemma (DD)* from FOL, and *Default Reasoning with Several*  
121 *Default (DRS)* from NM, respectively. From Table 5 (main paper), we can observe that ChatGPT  
122 shows poor performance on these inference rules and reasoning patterns, hence, we believe that  
123 analysis of logical explanations corresponding to these can give us more insights into the performance  
124 of ChatGPT. Here, we prompt the ChatGPT model to generate reasoning steps along with a predicted  
125 answer. Table 7, 8, and 9 represents five examples of (*Context, Question, Correct answer, Logical*  
126 *reasoning steps*) pairs generated by ChatGPT.

<sup>2</sup><https://huggingface.co/models>

## 127 F Few-shot Experiments

128 This section discusses the performance of the different LLMs in a few-shot setting on the *LogicBench(Eval)*. Here, we provide a prompt along with four distinct examples (two examples with  
129 *Yes* and two examples with *No*). Hence, we analyze an average performance across  $A(Yes)$  and  
130  $A(No)$ . Table 11 shows the performance for each inference rule and reasoning patterns achieved by  
131 FLAN-T5, Tk-instruct, UnifiedQA, GPT-3, and ChatGPT. For a better comparison between Table 5  
132 (main paper) and Table 11, we provide the average accuracy and standard deviation of Table 5 (main  
133 paper) corresponding to each inference rule in Table 10.

135 From Table 11, we can observe that UnifiedQA shows a performance drop of  $\sim 9\%$ ,  $\sim 2\%$  and  
136  $\sim 21\%$  on PL, FOL, and NM reasoning, respectively. As known, UnifiedQA [10] is not trained  
137 to understand the instructions, hence, adding in-context examples hampers the performance of this  
138 model. In contrast, FLAN-T5, GPT-3, and Tk-instruct show improved performance in the few-shot  
139 setting compared to zero-shot. As suggested in Lu et al., 2022 [16], prompt and instruction-tuned  
140 models are sensitive to in-context examples. Hence, we see performance variations in Table 11 across  
141 all models. Specifically, FLAN-T5 improves an average performance by  $\sim 12\%$  for both PL and  
142 FOL, however, it shows competitive performance on NM reasoning. On the other hand, GPT-3  
143 consistently outperforms zero-shot baselines by  $\sim 4\%$ ,  $\sim 6\%$ , and  $\sim 14\%$  for PL, FOL, and NM  
144 reasoning, respectively. Furthermore, Tk-instruct improves an average performance by  $\sim 8\%$  for  
145 PL, however, it shows competitive performance on FOL and NM reasoning. Interestingly, in-context  
146 examples in a few-shot setting hamper the performance of ChatGPT by  $\sim 9\%$ , and  $\sim 2\%$  for PL, and  
147 FOL, respectively, compared to zero-shot. However, ChatGPT improves performance by  $\sim 4\%$  on  
148 NM reasoning. Improved performance in NM reasoning demonstrates that the inclusion of in-context  
149 examples enhances the ability of these models to comprehend the nuanced meanings of logical terms  
150 such as “usually” and “typically”.

## 151 G Analysis on Bard and GPT-4

152 This section discusses a case study carried out on a  
153 Bard (Google) and GPT-4 (OpenAI) with the subset  
154 of the *LogicBench* dataset for each inference rule and  
155 reasoning pattern from PL, FOL, and NM reasoning.  
156 To evaluate both models, we use below prompt:

157 “Given context contains rules of logical reasoning in  
158 natural language. Answer the given question based on  
159 context ONLY in ‘yes’ or ‘no’ using logical reasoning  
160 ability. DO NOT generate anything as an answer apart  
161 from ‘yes’ and ‘no’.”

| Logic   | Bard  | GPT-4 |
|---------|-------|-------|
| PL      | 65.0% | 52.9% |
| FOL     | 71.1% | 74.6% |
| NM      | 15.0% | 60.9% |
| Average | 51.2% | 62.8% |

Table 12: Performance of BARD and GPT-4 on a subset of *LogicBench(Eval)*

162 **Bard** Due to the unavailability of Bard developer API  
163 during the evaluation timeline of this paper (April 2023), we manually evaluate a carefully selected  
164 subset of *LogicBench(Eval)*. We randomly selected five data samples containing (*context*, *question*,  
165 ‘Yes’) triplets since the goal of this evaluation is to see if the model can identify the relationship  
166 between logical rules (context) and conclusion (question). The experiment was conducted on a total  
167 of 125 samples by combining samples from all 25 inference rules and axioms. Results are presented  
168 in Table 12. Bard performs well on the FOL with the highest  $A(Yes)$  of 71.1% while it achieves  
169  $A(Yes)$  of 65%, and 15% on PL and NM reasoning, respectively. Bard performs poorly on NM  
170 reasoning showing that it struggles on understanding the nuance of logical words such as ‘normally’,  
171 ‘usually’, and ‘typically’.

172 **GPT-4** Due to the limited availability of GPT-4 API and the cost associated with each request,  
173 we evaluate GPT-4 on a subset of *LogicBench(Eval)*. We selected only (*context*, *question*, ‘Yes’)  
174 triplets since the goal of this evaluation is to see if the model can identify the relationship between

175 logical rules and conclusion. Results are presented in Table 12. GPT-4 performs well on the FOL  
176 with the highest  $A(Yes)$  of 74.6% while it achieves  $A(Yes)$  of 52.9%, and 60.9% on PL and NM  
177 logic, respectively.

## 178 H Extended Related Work

179 As LLMs such as GPT-4, and Bard continue to evolve rapidly, it becomes increasingly crucial to  
180 evaluate their diverse language capabilities, as well as those of forthcoming LLMs. Recently, many  
181 datasets have been created that evaluate different language understanding skills such as pronoun reso-  
182 lution [29, 13], commonsense reasoning [34], numerical reasoning [4, 27, 23], qualitative reasoning  
183 [33, 32], temporal reasoning [45], and feasibility reasoning [6]. Now, we present the advancements  
184 in prompt and instruction tuning using LLMs.

185 **Prompt Learning** The introduction of LLMs has significantly shifted the research trend in NLP  
186 to prompt-based learning methodologies [15]. Many studies have been conducted to investigate the  
187 efficacy of prompt-based learning in various applications including Text classification [43], Natural  
188 Language Inference (NLI) [31], and Question Answering (QA) [9], Information Extraction (IE)  
189 [2, 3], to name a few. In a recent development, the T0 model employs prompts to achieve zero-shot  
190 generalization across various NLP tasks [30]. Scao et al. 2021 suggested that the use of prompts  
191 could be as valuable as hundreds of data points on average [12].

192 **Instruction Learning** Efrat et al., 2020 [5] was focused on whether existing LLMs understand  
193 instructions. The same work in the field of instruction by [8, 42, 7, 44] has been proposed to show  
194 that models follow natural language instructions. In addition, Weller et al., 2020 [39] developed a  
195 framework focusing on NLP systems that solve challenging new tasks based on their description.  
196 Mishra et al., 2021 [22] have proposed natural language instructions for cross-task generalization  
197 of LLMs. Similarly, PromptSource [30] and FLAN [38] were built for leveraging instructions and  
198 achieving zero-shot generalization on unseen tasks. Moreover, Parmar et al., 2022 [26] shows the  
199 effectiveness of instructions in multi-task settings for the biomedical domain. Furthermore, Mishra  
200 et al., 2021 [21] discuss the impact of task instruction reframing. Min et al., 2021 [20] introduce a  
201 framework to better understand in-context learning. Ouyang et al., 2022 [25] propose the InstructGPT  
202 model that is fine-tuned with human feedback to follow instructions. Wang et al., 2022 [36] has  
203 developed an instruction-based multi-task framework for few-shot Named Entity Recognition (NER)  
204 tasks. In addition, many approaches have been proposed to improve model performance using  
205 instructions [40, 14, 37, 17, 11, 28, 24].

206 **Logic and NLI Datasets** FraCas [1] offers a unique approach to temporal semantics by converting  
207 syntax trees into logical formulas tailored for inference, emphasizing temporal elements such as  
208 references, adverbs, aspectual classes, and progressives. The Monotonicity Entailment Dataset  
209 (MED) [41] dives deep into monotonicity reasoning within NLI, probing the synergy between  
210 lexical and syntactic structures and spotlighting inherent challenges in both upward and downward  
211 monotonic reasoning trajectories. The SICK [18] dataset, with its foundation in 10,000 English  
212 sentence pairs, is designed to rigorously evaluate semantic relatedness and entailment, leveraging  
213 crowdsourced annotations for precision. HANS, or Heuristic Analysis for NLI Systems [19], stands  
214 out by rigorously scrutinizing the dependability of NLI models, putting the spotlight on potential  
215 pitfalls tied to syntactic heuristics such as lexical overlap. Lastly, CAD [35] introduces a meticulously  
216 crafted dataset from Reddit entries, targeting the detection of online abuse. This dataset boasts six  
217 distinct primary categories, context-aware annotations, provided rationales, and a rigorous group-  
218 adjudication methodology ensuring high-quality annotations.



| Inference Rules | Sentences from Stage 1                                                                                                                                                                                                                                                                                                                                                                                                                                                                 | Context and Question                                                                                                                                                                                                                                                                                                                                                                                                                                                                                                                                                                                                          |
|-----------------|----------------------------------------------------------------------------------------------------------------------------------------------------------------------------------------------------------------------------------------------------------------------------------------------------------------------------------------------------------------------------------------------------------------------------------------------------------------------------------------|-------------------------------------------------------------------------------------------------------------------------------------------------------------------------------------------------------------------------------------------------------------------------------------------------------------------------------------------------------------------------------------------------------------------------------------------------------------------------------------------------------------------------------------------------------------------------------------------------------------------------------|
| MT              | p: Liam finished his work early.<br>¬p: Liam did not finish his work early.<br>q: He will order pizza for dinner.<br>¬q: He will not order pizza for dinner.                                                                                                                                                                                                                                                                                                                           | <b>Context:</b> If Liam finished his work early, then he will order pizza for dinner.<br><b>Question:</b> If he won't order pizza for dinner, does this imply that Liam didn't finish his work early?                                                                                                                                                                                                                                                                                                                                                                                                                         |
| BD              | p(x): Someone drinks lots of water.<br>q(x): They will feel hydrated.<br>r(x): They eat too much sugar.<br>s(x): They will experience a sugar crash.<br>p(a): Jane drinks lots of water.<br>¬p(a): Jane does not drink lots of water.<br>q(a): She will feel hydrated.<br>¬q(a): She will not feel hydrated.<br>r(a): She eats too much sugar.<br>¬r(a): She does not eat too much sugar.<br>s(a): She will experience a sugar crash.<br>¬s(a): She will not experience a sugar crash. | <b>Context:</b> If someone drinks lots of water, then they will feel hydrated. If they eat too much sugar, then they will experience a sugar crash. We know that at least one of the following is true (1) Jane drinks lots of water and (2) She won't experience a sugar crash. Note that we do not know which ones of (1) and (2) are true. It might be the case that only (1) is true, or only (2) is true or both are true.<br><b>Question:</b> If at least one of (1) and (2) is true, can we say, at least one of the following must always be true? (a) She will feel hydrated and (b) She doesn't eat too much sugar. |
| MP              | p(x): Someone is exhausted.<br>q(x): They will take a rest.<br>p(a): Jack is exhausted.<br>¬p(a): Jack is not exhausted.<br>q(a): He will take a rest.<br>¬q(a): He will not take a rest.                                                                                                                                                                                                                                                                                              | <b>Context:</b> If someone is exhausted, then they will take a rest.<br><b>Question:</b> If Jack is exhausted, does this entail that he will take a rest?                                                                                                                                                                                                                                                                                                                                                                                                                                                                     |
| DS              | p: John is watching a movie.<br>¬p: John is not watching a movie.<br>q: He is playing a game.<br>¬q: He is not playing a game.                                                                                                                                                                                                                                                                                                                                                         | <b>Context:</b> We know that at least one of the following is true (1) John is watching a movie and (2) He is playing a game. Note that we do not know which ones of (1) and (2) are true. It might be the case that only (1) is true, or only (2) is true or both are true.<br><b>Question:</b> If he is not watching a movie, does this mean that is playing a game?                                                                                                                                                                                                                                                        |
| HS              | p(x): Someone buys all the necessary supplies.<br>q(x): They can start the project.<br>r(x): They will finish it on time.<br>p(a): Lily bought all the necessary supplies.<br>¬p(a): Lily did not buy all the necessary supplies.<br>q(a): She can start the project.<br>¬q(a): She can not start the project.<br>s(a): She will finish it on time.<br>¬s(a): She will not finish it on time.                                                                                          | <b>Context:</b> If someone buys all the necessary supplies, then they can start the project. If they can start the project, then they will finish it on time.<br><b>Question:</b> If Lily didn't buy all the necessary supplies, does this imply that she won't finish it on time?                                                                                                                                                                                                                                                                                                                                            |
| CD              | p: Harry goes to the park.<br>¬p: Harry does not go to the park.<br>q: He will have a picnic with his family.<br>¬q: He will not have a picnic with his family.<br>r: He goes to the beach.<br>¬r: He does not go to the beach.<br>s: He will swim in the ocean.<br>¬s: He will not swim in the ocean.                                                                                                                                                                                 | <b>Context:</b> If Harry goes to the park, then he will have a picnic with his family. If he goes to the beach, then he will swim in the ocean. We know that at least one of the following is true (1) Harry goes to the park and (2) He goes to the beach. Note that we do not know which ones of (1) and (2) are true. It might be the case that only (1) is true, or only (2) is true or both are true.<br><b>Question:</b> If at least one of (1) and (2) is true, can we say, at least one of the following must always be true? (a) He will have a picnic with his family and (b) He will swim in the ocean             |
| DD              | p: I order takeout.<br>¬p: I did not order takeout.<br>q: I will save time.<br>¬q: I will not save time.<br>r: I cook a meal.<br>¬r: I did not cook a meal.<br>s: I will save money.<br>¬s: I will not save money.                                                                                                                                                                                                                                                                     | <b>Context:</b> If I order takeout, then I will save time. If I cook a meal, then I will save money. We know that at least one of the following is true (1) I won't save time and (2) I won't save money. Note that we do not know which ones of (1) and (2) are true. It might be the case that only (1) is true, or only (2) is true or both are true.<br><b>Question:</b> If at least one of (1) and (2) is true, can we say, at least one of the following must always be true? (a) I order takeout and (b) I cook a meal                                                                                                 |
| CT              | p: Tom is an avid reader.<br>¬p: Tom is not an avid reader.<br>q: He devours books of all genres.<br>¬q: He does not devour books of all genres.                                                                                                                                                                                                                                                                                                                                       | <b>Context:</b> We know that at least one of the following is true (1) Tom is an avid reader and (2) he devours books of all genres. Note that we do not know which ones of (1) and (2) are true. It might be the case that only (1) is true, or only (2) is true or both are true.<br><b>Question:</b> If at least one of (1) and (2) is true, can we say, at least one of the following must always be true? (a) he devours books of all genres and (b) Tom is an avid reader                                                                                                                                               |
| MI              | p: He is not eating healthy.<br>¬p: He is eating healthy.<br>q: He will not gain weight.<br>¬q: He will gain weight.                                                                                                                                                                                                                                                                                                                                                                   | <b>Context:</b> If he is not eating healthy, then he will not gain weight.<br><b>Question:</b> Based on context, can we say, at least one of the following must always be true? (a) he is eating healthy and (b) he will gain weight                                                                                                                                                                                                                                                                                                                                                                                          |
| EI              | p(x): Someone has coding skills.<br>p(a): Sheila is a proficient programmer.                                                                                                                                                                                                                                                                                                                                                                                                           | <b>Context:</b> Sheila is a proficient programmer.<br><b>Question:</b> Does this mean that someone has coding skills?                                                                                                                                                                                                                                                                                                                                                                                                                                                                                                         |
| UI              | p(x): Students need to take an exam to complete their degree<br>p(a): Reema is a student.                                                                                                                                                                                                                                                                                                                                                                                              | <b>Context:</b> All students need to take an exam to complete their degree. Reema is a student.<br><b>Question:</b> Does Reema need to take an exam to complete her degree                                                                                                                                                                                                                                                                                                                                                                                                                                                    |

Table 4: Illustrative examples of NL logical context and questions created using sentences that are generated in section 2.2.1 for inference rules and axioms covered in PL and FOL.

| Reasoning Pattern | Sentences from Stage 1                                                                                                                                                                                                                                                                                                                                                                                                                                         | Context and Question                                                                                                                                                                                                                                                                                                             |
|-------------------|----------------------------------------------------------------------------------------------------------------------------------------------------------------------------------------------------------------------------------------------------------------------------------------------------------------------------------------------------------------------------------------------------------------------------------------------------------------|----------------------------------------------------------------------------------------------------------------------------------------------------------------------------------------------------------------------------------------------------------------------------------------------------------------------------------|
| DRI               | <p>p: Cats and dogs are mammals.<br/> q: Mammals typically have fur.<br/> r: Cats don't have fur.<br/> s: Dogs are loyal animals.<br/> t: Dogs have fur.<br/> ¬t: Dogs don't have fur.</p>                                                                                                                                                                                                                                                                     | <p><b>Context:</b> Cats and dogs are mammals. mammals typically have fur. cats don't have fur. dogs are loyal animals.</p> <p><b>Question:</b> Does this imply that dogs have fur?</p>                                                                                                                                           |
| DRS               | <p>p: John and Mary are parents.<br/> q: Parents are usually loving and supportive.<br/> r: Parents are normally responsible.<br/> s: Mary isn't loving and supportive.<br/> t: John is not responsible.<br/> u: Mary is responsible.<br/> ¬u: Mary isn't responsible.<br/> v: John is loving and supportive.<br/> ¬v: John isn't loving and supportive.</p>                                                                                                   | <p><b>Context:</b> John and Mary are parents. parents are usually loving and supportive. parents are normally responsible. Mary isn't loving and supportive. John is not responsible.</p> <p><b>Question:</b> Does this imply that Mary is responsible and John is loving and supportive?</p>                                    |
| DRD               | <p>p: Jenny and Anna are tall.<br/> q: Tall people usually play basketball.<br/> r: Anna is possibly an exception to this rule.<br/> s: Jenny plays basketball.<br/> ¬s: Jenny doesn't play basketball.</p>                                                                                                                                                                                                                                                    | <p><b>Context:</b> Jenny and Anna are tall. Tall people usually play basketball. Anna is possibly an exception to this rule.</p> <p><b>Question:</b> Does this entail that Jenny plays basketball?</p>                                                                                                                           |
| DRO               | <p>p: Hummingbirds are birds.<br/> q: Birds migrate south for the winter.<br/> r: Hummingbirds do not migrate south for the winter.<br/> s: All other birds than hummingbirds migrate south for the winter.<br/> ¬s: All other birds than hummingbirds don't migrate south for the winter.</p>                                                                                                                                                                 | <p><b>Context:</b> Hummingbirds are birds. Birds migrate south for the winter. Hummingbirds do not migrate south for the winter.</p> <p><b>Question:</b> Does this mean that all other birds than hummingbirds migrate south for the winter?</p>                                                                                 |
| RE1               | <p>p: Cats, dogs, and horses are animals.<br/> q: Animals are usually considered to be intelligent creatures.<br/> r: At least one of the cats or dogs is not considered intelligent.<br/> s: Horses are considered to be intelligent creatures.<br/> ¬s: Horses aren't considered to be intelligent creatures.<br/> t: Exactly one of the cats or dogs is not considered intelligent.<br/> ¬t: Exactly one of the cats or dogs is considered intelligent.</p> | <p><b>Context:</b> Does this entail that horses are considered to be intelligent creatures and exactly one of cats or dogs is not considered intelligent?</p> <p><b>Question:</b> Does this entail that horses are considered to be intelligent creatures and exactly one of the cats or dogs is not considered intelligent?</p> |
| RE2               | <p>p: Cats normally meow.<br/> q: At least one species of cat doesn't meow.<br/> r: Exactly one species of cat doesn't meow.<br/> ¬r: Exactly one species of cat meows.</p>                                                                                                                                                                                                                                                                                    | <p><b>Context:</b> Cats normally meow. At least one species of cat doesn't meow.</p> <p><b>Question:</b> Does this entail that exactly one species of cat doesn't meow?</p>                                                                                                                                                      |
| RE3               | <p>p: Cars have four wheels.<br/> q: Wheels normally have spokes.<br/> r: At least one wheel does not have spokes.<br/> s: Cars have four wheels with spokes.<br/> ¬s: Cars don't have four wheels with spokes.</p>                                                                                                                                                                                                                                            | <p><b>Context:</b> Cars have four wheels. wheels normally have spokes. at least one wheel does not have spokes.</p> <p><b>Question:</b> Does this imply that cars have four wheels with spokes?</p>                                                                                                                              |
| RAP               | <p>p: John asserts that Sally was in the store.<br/> q: Jane asserts that Sally was not in the store.<br/> r: John's evidence is more reliable than Jane's.<br/> ¬r: John's evidence is less reliable than Jane's.<br/> s: Sally was in the store.<br/> ¬s: Sally wasn't in the store.</p>                                                                                                                                                                     | <p><b>Context:</b> John asserts that Sally was in the store. Jane asserts that Sally was not in the store.</p> <p><b>Question:</b> If John's evidence is more reliable than Jane's, does this mean that Sally was in the store?</p>                                                                                              |

Table 5: Illustrative examples of NL logical context and questions created using sentences that are generated in section 2.2.1 for reasoning patterns covered in NM reasoning.

|            |       | GPT-3       |             |             | ChatGPT     |             |             |
|------------|-------|-------------|-------------|-------------|-------------|-------------|-------------|
| Type       | Axiom | $A(No)$     | $A(Yes)$    | $Acc$       | $A(No)$     | $A(Yes)$    | $Acc$       |
| PL         | DD    | 80.4        | 37.5        | 67.5        | 89.3        | 58.3        | 80          |
|            | HS    | 100         | 43.5        | 67.5        | 100         | 66.7        | 87.5        |
|            | MT    | 90.2        | 41          | 66.2        | 86.4        | 78.6        | 85          |
|            | BD    | 86.5        | 46.4        | 72.5        | 85.5        | 61.1        | 80          |
|            | MI    | 100         | 26.7        | 31.2        | 69.5        | 9.5         | 53.8        |
|            | DS    | 75.4        | 27.3        | 68.8        | 74.7        | 0           | 73.8        |
|            | CD    | 94.4        | 40.9        | 65          | 91.7        | 75          | 87.5        |
|            | CT    | 97.8        | 55.9        | 80          | 100         | 55.6        | 80          |
| <b>Avg</b> |       | <b>90.6</b> | <b>39.9</b> | <b>64.8</b> | <b>87.1</b> | <b>50.6</b> | <b>78.4</b> |
| FOL        | DD    | 73.8        | 20          | 63.7        | 80.4        | 34.5        | 63.7        |
|            | MP    | 93.3        | 58          | 71.2        | 81.5        | 80.8        | 81.2        |
|            | HS    | 100         | 52.6        | 77.5        | 87.9        | 59.1        | 80          |
|            | MT    | 82.6        | 35.3        | 62.5        | 83.1        | 88.9        | 83.8        |
|            | BD    | 79.7        | 43.8        | 72.5        | 87.5        | 75          | 85          |
|            | UI    | 100         | 80          | 87.5        | 83.3        | 100         | 90          |
|            | EI    | 86.4        | 94.4        | 90          | 62.5        | 100         | 70          |
|            | DS    | 80.8        | 85.7        | 81.2        | 75          | 0           | 75          |
|            | CD    | 95.7        | 51.6        | 75          | 90.5        | 82.4        | 88.8        |
| <b>Avg</b> |       | <b>88</b>   | <b>57.9</b> | <b>75.7</b> | <b>81.3</b> | <b>69</b>   | <b>79.7</b> |
| NM         | RAP   | 68.9        | 74.3        | 71.2        | 50          | 0           | 50          |
|            | RE3   | 51.9        | 53.8        | 52.5        | 50          | 50          | 50          |
|            | RE2   | 48.7        | 0           | 47.5        | 55.6        | 100         | 60          |
|            | DRS   | 66.1        | 4.2         | 47.5        | 68.8        | 0           | 55          |
|            | DRI   | 59.1        | 61.1        | 60          | 44.4        | 0           | 40          |
|            | RE1   | 72.3        | 13.3        | 61.3        | 73.3        | 0           | 68.8        |
|            | DRO   | 63.2        | 61.9        | 62.5        | 50          | 0           | 50          |
|            | DRD   | 87.5        | 59.4        | 65          | 51.3        | 100         | 52.5        |
| <b>Avg</b> |       | <b>64.7</b> | <b>41</b>   | <b>58.4</b> | <b>55.4</b> | <b>31.2</b> | <b>53.3</b> |

Table 6: Performance of GPT-3 and ChatGPT in Chain-of-Thought (CoT) setting in terms of label-wise accuracy on LogicBench(Eval), where  $A(Yes)$  and  $A(No)$  denote the accuracy for the Yes and No labels, respectively.  $Acc$  denotes combined accuracy.

| Context                                                                                                                                                                                                                                                                                  | Question                                                                                        | Answer | Logical Explanation                                                                                                                                                                                                                                                                                                                                                                                                                                                                                                                                                                                                                                                                                                                                                                                                                                                                                                                                                                                                                                                                                                                                                                                                          |
|------------------------------------------------------------------------------------------------------------------------------------------------------------------------------------------------------------------------------------------------------------------------------------------|-------------------------------------------------------------------------------------------------|--------|------------------------------------------------------------------------------------------------------------------------------------------------------------------------------------------------------------------------------------------------------------------------------------------------------------------------------------------------------------------------------------------------------------------------------------------------------------------------------------------------------------------------------------------------------------------------------------------------------------------------------------------------------------------------------------------------------------------------------------------------------------------------------------------------------------------------------------------------------------------------------------------------------------------------------------------------------------------------------------------------------------------------------------------------------------------------------------------------------------------------------------------------------------------------------------------------------------------------------|
| We know that atleast one of the following is true (1) she is not making a cake for the party and (2) he is writing a report for his boss. Note that we do not know which ones of (1) and (2) are true. It might be the case that only (1) is true, or only (2) is true or both are true. | If she is making a cake for the party, does this mean that he is writing a report for his boss? | Yes    | No.<br>Logical reasoning steps:<br>1. We are given two possibilities: either she is not making a cake for the party (denoted as statement 1) or he is writing a report for his boss (denoted as statement 2).<br>2. We are not given any information that directly connects the two statements or suggests that they are dependent on each other.<br>3. Therefore, the presence or absence of her making a cake does not provide any conclusive information about whether he is writing a report.<br>4. Without further evidence or a clear relationship between the statements, we cannot infer that if she is making a cake, he must be writing a report.<br>5. Hence, the answer to the question "If she is making a cake for the party, does this mean that he is writing a report for his boss?" is "No."                                                                                                                                                                                                                                                                                                                                                                                                               |
| We know that atleast one of the following is true (1) John is not at school and (2) Mary is taking a break from her job. Note that we do not know which ones of (1) and (2) are true. It might be the case that only (1) is true, or only (2) is true or both are true.                  | If John is at school, does this entail that Mary is taking a break from her job?                | Yes    | No, if John is at school, it does not entail that Mary is taking a break from her job.<br>Logical Reasoning Steps:<br>1. We are given two possibilities: either John is not at school or Mary is taking a break from her job.<br>2. If John is at school, it means that the first possibility (John is not at school) is false.<br>3. Since the first possibility is false, the second possibility (Mary is taking a break from her job) could still be true or false.<br>4. Therefore, we cannot conclude that Mary is taking a break from her job just because John is at school.<br>5. The answer to the question is "No."                                                                                                                                                                                                                                                                                                                                                                                                                                                                                                                                                                                                |
| We know that atleast one of the following is true (1) Levi is not studying for his exams and (2) Maya is writing a book. Note that we do not know which ones of (1) and (2) are true. It might be the case that only (1) is true, or only (2) is true or both are true.                  | If Levi is studying for his exams, does this mean that Maya is writing a book?                  | Yes    | No, if Levi is studying for his exams, it does not necessarily mean that Maya is writing a book.<br>Logical Reasoning Steps:<br>1. Given the context, we know that at least one of the following statements is true: a) Levi is not studying for his exams. b) Maya is writing a book.<br>2. The question asks whether if Levi is studying for his exams, it implies that Maya is writing a book.<br>3. Since we don't have any information about the relationship between Levi studying for his exams and Maya writing a book, we cannot make a definitive conclusion.<br>4. It is possible that Levi is studying for his exams while Maya is not writing a book. In this case, the statement "Levi is studying for his exams" does not imply that Maya is writing a book.<br>5. It is also possible that both statements (1) and (2) are true, meaning Levi is not studying for his exams and Maya is writing a book. In this case, the statement "Levi is studying for his exams" would be false, but it still wouldn't imply that Maya is writing a book.<br>6. Therefore, without additional information, we cannot determine a direct logical implication between Levi studying for his exams and Maya writing a book. |
| We know that atleast one of the following is true (1) Chloe is studying for her exams and (2) Mila is going on vacation. Note that we do not know which ones of (1) and (2) are true. It might be the case that only (1) is true, or only (2) is true or both are true.                  | If Chloe isn't studying for her exams, does this entail that Mila is going on vacation?         | Yes    | No, if Chloe isn't studying for her exams, it does not necessarily entail that Mila is going on vacation. Here are the logical reasoning steps:<br>1. We are given that at least one of the following is true: (1) Chloe is studying for her exams and (2) Mila is going on vacation.<br>2. It could be the case that only (1) is true, meaning Chloe is studying for her exams but Mila is not going on vacation.<br>3. If Chloe isn't studying for her exams, it means that (1) is not true, but it does not provide any information about whether (2) is true or not.<br>4. Therefore, we cannot conclude that Mila is going on vacation solely based on the information that Chloe isn't studying for her exams.<br>5. In summary, the absence of Chloe studying for her exams does not imply anything about Mila going on vacation.                                                                                                                                                                                                                                                                                                                                                                                     |
| We know that atleast one of the following is true (1) Ava is not attending the music festival and (2) she is studying for her exams. Note that we do not know which ones of (1) and (2) are true. It might be the case that only (1) is true, or only (2) is true or both are true.      | If Ava is attending the music festival, does this mean that she is studying for her exams?      | Yes    | No.<br>Logical reasoning steps:<br>1. We are given that at least one of the following is true: a. Ava is not attending the music festival. b. Ava is studying for her exams.<br>2. The question asks if Ava is attending the music festival, does this mean she is studying for her exams?<br>3. Since we know that either (1) or (2) or both are true, it is possible that Ava is attending the music festival without studying for her exams. It could be the case that Ava is not studying for her exams even if she decides to attend the music festival.<br>4. Therefore, the answer to the question is "No."                                                                                                                                                                                                                                                                                                                                                                                                                                                                                                                                                                                                           |

Table 7: Illustrative examples of logical explanations generated by ChatGPT for *Disjunctive Syllogism* from PL

| Context                                                                                                                                                                                                                                                                                                                                                                                                                               | Question                                                                                                                                                                                                | Answer | Logical Explanation                                                                                                                                                                                                                                                                                                                                                                                                                                                                                                                                                                                                                                                                                                                                                                                                                                                                                                                                                                                                                                                                                                                                                                                                                                                                                                                                                                                                                                                                                                                                                                                                                                                                                                                                                                                                                                                                                              |
|---------------------------------------------------------------------------------------------------------------------------------------------------------------------------------------------------------------------------------------------------------------------------------------------------------------------------------------------------------------------------------------------------------------------------------------|---------------------------------------------------------------------------------------------------------------------------------------------------------------------------------------------------------|--------|------------------------------------------------------------------------------------------------------------------------------------------------------------------------------------------------------------------------------------------------------------------------------------------------------------------------------------------------------------------------------------------------------------------------------------------------------------------------------------------------------------------------------------------------------------------------------------------------------------------------------------------------------------------------------------------------------------------------------------------------------------------------------------------------------------------------------------------------------------------------------------------------------------------------------------------------------------------------------------------------------------------------------------------------------------------------------------------------------------------------------------------------------------------------------------------------------------------------------------------------------------------------------------------------------------------------------------------------------------------------------------------------------------------------------------------------------------------------------------------------------------------------------------------------------------------------------------------------------------------------------------------------------------------------------------------------------------------------------------------------------------------------------------------------------------------------------------------------------------------------------------------------------------------|
| <p>If someone takes care of her health, then they will be fit and healthy. If they indulge in unhealthy habits, then they will be prone to diseases. We know that at least one of the following is true (1) Jenny won't be fit and healthy and (2) she won't be prone to diseases. Note that we do not know which ones of (1) and (2) are true. It might be the case that only (1) is true, or only (2) is true or both are true.</p> | <p>If at least one of (1) and (2) is true, can we say, at least one of the following must always be true? (a) Jenny doesn't take care of her health and (b) she doesn't indulge in unhealthy habits</p> | Yes    | <p>No, we cannot say that at least one of the following must always be true: (a) Jenny doesn't take care of her health, and (b) she doesn't indulge in unhealthy habits.</p> <p>Logical Reasoning Steps:</p> <ol style="list-style-type: none"> <li>If someone takes care of their health, they will be fit and healthy. This implies that if Jenny takes care of her health, she will be fit and healthy.</li> <li>If someone indulges in unhealthy habits, they will be prone to diseases. This implies that if Jenny indulges in unhealthy habits, she will be prone to diseases.</li> <li>We are given that at least one of the following is true: (1) Jenny won't be fit and healthy, or (2) she won't be prone to diseases. This means that it could be the case that only (1) is true, only (2) is true, or both are true.</li> <li>If only (1) is true, it means Jenny won't be fit and healthy, but we don't know if she takes care of her health or indulges in unhealthy habits.</li> <li>If only (2) is true, it means Jenny won't be prone to diseases, but we don't know if she takes care of her health or indulges in unhealthy habits.</li> <li>If both (1) and (2) are true, it means Jenny won't be fit and healthy and won't be prone to diseases, but we still don't know if she takes care of her health or indulges in unhealthy habits.</li> <li>Therefore, we cannot conclude that at least one of the following must always be true: (a) Jenny doesn't take care of her health, and (b) she doesn't indulge in unhealthy habits.</li> </ol>                                                                                                                                                                                                                                                                                                                                            |
| <p>If someone takes a walk, then they will get fresh air. If they watch tv, then they will feel relaxed. We know that at least one of the following is true (1) Jill won't get fresh air, and (2) she won't feel relaxed. Note that we do not know which ones of (1) and (2) are true. It might be the case that only (1) is true, or only (2) is true or both are true.</p>                                                          | <p>If at least one of (1) and (2) is true, can we say, at least one of the following must always be true? (a) Jill doesn't take a walk, and (b) she doesn't watch tv.</p>                               | Yes    | <p>No, we cannot say that at least one of the following must always be true: (a) Jill doesn't take a walk, and (b) she doesn't watch TV.</p> <p>Logical Reasoning Steps:</p> <ol style="list-style-type: none"> <li>Given the context, we know that if someone takes a walk, they will get fresh air.</li> <li>We also know that if someone watches TV, they will feel relaxed.</li> <li>It is stated that at least one of the following is true: (1) Jill won't get fresh air, and (2) she won't feel relaxed.</li> <li>Based on the given information, we cannot determine which one of (1) or (2) is true, or if both are true.</li> <li>If (1) is true, it means that Jill won't get fresh air. This does not necessarily imply that she won't take a walk because there could be other reasons for her not getting fresh air.</li> <li>Similarly, if (2) is true, it means that Jill won't feel relaxed. This does not necessarily imply that she won't watch TV because there could be other reasons for her not feeling relaxed.</li> <li>Therefore, we cannot conclude that at least one of the statements (a) Jill doesn't take a walk or (b) she doesn't watch TV must always be true, as the given information does not provide enough evidence to support that conclusion.</li> </ol>                                                                                                                                                                                                                                                                                                                                                                                                                                                                                                                                                                                                                |
| <p>If someone turns off the lights, then they will save electricity. If they use a generator, then they will pay a high electricity bill. We know that at least one of the following is true (1) Linda won't save electricity and (2) she won't pay a high electricity bill. Note that we do not know which ones of (1) and (2) are true. It might be the case that only (1) is true, or only (2) is true or both are true.</p>       | <p>If at least one of (1) and (2) is true, can we say, at least one of the following must always be true? (a) Linda doesn't turn off the lights and (b) she doesn't use a generator</p>                 | Yes    | <p>No, we cannot say that at least one of the following must always be true: (a) Linda doesn't turn off the lights and (b) she doesn't use a generator.</p> <p>Logical Reasoning Steps:</p> <ol style="list-style-type: none"> <li>From the given context, we have the following conditional statements: If someone turns off the lights, then they will save electricity. If someone uses a generator, then they will pay a high electricity bill.</li> <li>We are also given that at least one of the following is true: (1) Linda won't save electricity. (2) Linda won't pay a high electricity bill.</li> <li>Let's consider the possibilities: If only (1) is true, it means Linda won't save electricity. This doesn't provide any information about whether Linda will turn off the lights or use a generator. If only (2) is true, it means Linda won't pay a high electricity bill. Again, this doesn't provide any information about whether Linda will turn off the lights or use a generator.</li> <li>If both (1) and (2) are true, it means Linda won't save electricity and won't pay a high electricity bill. This still doesn't provide any information about whether Linda will turn off the lights or use a generator.</li> <li>Since we don't have any specific information about whether Linda will turn off the lights or use a generator, we cannot conclude that at least one of the following must always be true: (a) Linda doesn't turn off the lights and (b) she doesn't use a generator. The given context doesn't establish a direct relationship between Linda's actions regarding turning off the lights or using a generator and statements (1) and (2).</li> </ol>                                                                                                                                                                                                           |
| <p>If someone reads a lot, then they will get good grades. If they watch television, then they will have a sound sleep. We know that at least one of the following is true (1) Jill won't get good grades and (2) she won't have a sound sleep. Note that we do not know which ones of (1) and (2) are true. It might be the case that only (1) is true, or only (2) is true or both are true.</p>                                    | <p>If at least one of (1) and (2) is true, can we say, at least one of the following must always be true? (a) Jill doesn't read a lot and (b) she doesn't watch television</p>                          | Yes    | <p>No, we cannot say that at least one of the following must always be true: (a) Jill doesn't read a lot, and (b) she doesn't watch television.</p> <p>Logical Reasoning:</p> <ol style="list-style-type: none"> <li>If someone reads a lot, then they will get good grades. This implies that if Jill doesn't get good grades, she may not read a lot. This supports the possibility of (a) being true.</li> <li>If someone watches television, then they will have a sound sleep. This implies that if Jill doesn't have a sound sleep, she may not watch television. This supports the possibility of (b) being true.</li> <li>Given the information that at least one of (1) and (2) is true, we cannot determine which specific statement is true. It is possible that only (1) is true, only (2) is true, or both (1) and (2) are true. Therefore, we cannot conclude that either (a) or (b) must always be true.</li> </ol>                                                                                                                                                                                                                                                                                                                                                                                                                                                                                                                                                                                                                                                                                                                                                                                                                                                                                                                                                                               |
| <p>If someone takes a test, then they will get a good grade. If they do not revise enough, then they will not score well. We know that at least one of the following is true (1) John won't get a good grade and (2) he will score well. Note that we do not know which ones of (1) and (2) are true. It might be the case that only (1) is true, or only (2) is true or both are true.</p>                                           | <p>If at least one of (1) and (2) is true, can we say, at least one of the following must always be true? (a) John doesn't take a test and (b) he revises enough</p>                                    | Yes    | <p>No, we cannot say that at least one of the following must always be true: (a) John doesn't take a test, and (b) he revises enough. Here are the logical reasoning steps:</p> <ol style="list-style-type: none"> <li>Given the context, we know that if someone takes a test, they will get a good grade. This implies the logical statement: "If taking a test, then a good grade."</li> <li>We also know that if someone does not revise enough, they will not score well. This implies the logical statement: "If not revising enough, then not scoring well."</li> <li>The context states that at least one of the following is true: (1) John won't get a good grade, and (2) he will score well.</li> <li>Let's analyze the possibilities: <ol style="list-style-type: none"> <li>If only (1) is true, it means John won't get a good grade. This could be because he either didn't take the test or didn't revise enough. Therefore, (a) John doesn't take a test that could be true, but (b) he revises enough that may or may not be true.</li> <li>If only (2) is true, it means John will score well. This could be because he either took the test and revised enough or only revised enough. Therefore, (a) John doesn't take a test may or may not be true, but (b) he revises enough could be true.</li> <li>If both (1) and (2) are true, it means John won't get a good grade but will still score well. This could happen if he revised enough but didn't take the test. In this case, (a) John doesn't take a test would be true, but (b) he revises enough would be false.</li> </ol> </li> <li>Considering all the possibilities, we cannot conclude that at least one of the following must always be true: (a) John doesn't take a test, and (b) he revises enough. The truth values of (a) and (b) depend on the specific circumstances regarding John's test and revision.</li> </ol> |

Table 8: Illustrative examples of logical explanations generated by ChatGPT for *Destructive Dilemma* from FOL

| Context                                                                                                                                                            | Question                                                                    | Answer | Logical Steps                                                                                                                                                                                                                                                                                                                                                                                                                                                                                                                                                                                                                                                                                                                                                                                                                                                                                                                                                                                                                                                                                                                  |
|--------------------------------------------------------------------------------------------------------------------------------------------------------------------|-----------------------------------------------------------------------------|--------|--------------------------------------------------------------------------------------------------------------------------------------------------------------------------------------------------------------------------------------------------------------------------------------------------------------------------------------------------------------------------------------------------------------------------------------------------------------------------------------------------------------------------------------------------------------------------------------------------------------------------------------------------------------------------------------------------------------------------------------------------------------------------------------------------------------------------------------------------------------------------------------------------------------------------------------------------------------------------------------------------------------------------------------------------------------------------------------------------------------------------------|
| John and Mary are parents. Parents are usually loving and supportive. Parents are normally responsible. Mary isn't loving and supportive. John is not responsible. | Does this imply that Mary is responsible and John is loving and supportive? | Yes    | No, this context does not imply that Mary is responsible and John is loving and supportive.<br><br>Logical Reasoning Steps:<br><ol style="list-style-type: none"> <li>The context states that parents are usually loving and supportive, and parents are normally responsible.</li> <li>However, it also mentions that Mary isn't loving and supportive and John is not responsible.</li> <li>Since the context specifies that Mary isn't loving and supportive, it contradicts the assumption that Mary is responsible.</li> <li>Similarly, the context specifies that John is not responsible, which contradicts the assumption that John is loving and supportive.</li> <li>Therefore, based on the given context, we cannot conclude that Mary is responsible or that John is loving and supportive.</li> </ol>                                                                                                                                                                                                                                                                                                            |
| Apples and bananas are fruits. Fruits are usually sweet. Fruits are normally juicy. Apples are not sweet. Bananas are not juicy.                                   | Does this mean that bananas are sweet and apples are juicy?                 | Yes    | No.<br><br>Logical Reasoning Steps:<br><ol style="list-style-type: none"> <li>The context establishes that fruits are usually sweet and normally juicy.</li> <li>It also states that apples are not sweet and bananas are not juicy.</li> <li>Therefore, based on the context, we can conclude that neither apples nor bananas fit the typical characteristics of fruits.</li> <li>Since the given context does not provide any information suggesting that bananas are sweet or that apples are juicy, we cannot infer that bananas are sweet or that apples are juicy.</li> <li>Therefore, the answer to the question is "No."</li> </ol>                                                                                                                                                                                                                                                                                                                                                                                                                                                                                    |
| Cats and dogs are animals. Animals have four legs. Animals have fur. Cats have no fur. Dogs are not four-legged.                                                   | Does this mean that dogs have fur and cats have four legs?                  | Yes    | No, dogs do not necessarily have fur and cats do not necessarily have four legs. The given context states that animals have four legs and fur, but it also specifically mentions that cats have no fur and dogs are not four-legged. Therefore, based on the context, we cannot conclude that dogs have fur or that cats have four legs.<br><br>Logical reasoning steps:<br><ol style="list-style-type: none"> <li>Cats and dogs are animals.</li> <li>Animals have four legs.</li> <li>Animals have fur.</li> <li>Cats have no fur (from the context).</li> <li>Dogs are not four-legged (from the context).</li> <li>Therefore, based on the given context, we cannot conclude that dogs have fur or that cats have four legs.</li> </ol>                                                                                                                                                                                                                                                                                                                                                                                    |
| Birds and fish are animals. Animals have four legs. Animals are normally omnivores. Birds don't have four legs. Fish is not an omnivore.                           | Does this imply that fish have four legs and birds are omnivores?           | Yes    | No, this context does not imply that fish have four legs and birds are omnivores.<br><br>Logical Reasoning Steps:<br><ol style="list-style-type: none"> <li>The context states that animals have four legs. This implies that all animals, including birds and fish, are expected to have four legs.</li> <li>However, the context also mentions that birds don't have four legs. This means that birds deviate from the general expectation of having four legs.</li> <li>The context further states that animals are normally omnivores. This implies that the general expectation is for animals to be omnivores, including birds and fish.</li> <li>However, the context also mentions that fish is not an omnivore. This means that fish deviates from the general expectation of being omnivores.</li> <li>Combining these statements, we can conclude that birds do not have four legs and fish is not an omnivore, contradicting the general expectations mentioned in the context.</li> <li>Therefore, based on the given context, it cannot be inferred that fish have four legs and birds are omnivores.</li> </ol> |
| Blocks A and B are heavy. Heavy blocks are normally located on the table. Heavy blocks are normally red. A is not on the table. B is not red.                      | Does the context imply that B is on the table and A is red in color?        | Yes    | No, the context does not imply that B is on the table and A is red in color.<br><br>Logical reasoning steps:<br><ol style="list-style-type: none"> <li>The context states that heavy blocks are normally located on the table, but it does not specifically mention the current location of block B. Therefore, we cannot conclude that B is on the table.</li> <li>The context also mentions that heavy blocks are normally red, but it states that block B is not red. Therefore, we cannot conclude that A is red in color.</li> <li>Based on the given information, we can only infer that A is not on the table and B is not red. Any further conclusions about the specific location of B or the color of A cannot be made with certainty.</li> </ol>                                                                                                                                                                                                                                                                                                                                                                    |

Table 9: Illustrative examples of logical explanations generated by ChatGPT for *Default Reasoning with Several Default* from NM reasoning

| Type | Axiom                  | FLAN-T5                      | Tk-instruct                  | UnifiedQA                    | GPT-3                        | ChatGPT                      |
|------|------------------------|------------------------------|------------------------------|------------------------------|------------------------------|------------------------------|
| PL   | HS                     | 73.3 <sub>0.0072</sub>       | 81.2 <sub>0.0375</sub>       | 82.1 <sub>0.0505</sub>       | 91.7 <sub>0.0361</sub>       | 81.2 <sub>0.0125</sub>       |
|      | DS                     | 34.6 <sub>0.1449</sub>       | 47.9 <sub>0.0753</sub>       | 54.6 <sub>0.0191</sub>       | 75.4 <sub>0.01909</sub>      | 69.6 <sub>0.01909</sub>      |
|      | CD                     | 31.7 <sub>0.0629</sub>       | 40.8 <sub>0.1264</sub>       | 35.8 <sub>0.0887</sub>       | 90 <sub>0.0433</sub>         | 93.8 <sub>0.0216</sub>       |
|      | DD                     | 62.5 <sub>0.0433</sub>       | 67.5 <sub>0.0866</sub>       | 6.7 <sub>0.0288</sub>        | 73.3 <sub>0.0072</sub>       | 49.2 <sub>0.0688</sub>       |
|      | BD                     | 28.3 <sub>0.0144</sub>       | 50.4 <sub>0.1120</sub>       | 12.9 <sub>0.0144</sub>       | 81.2 <sub>0.0433</sub>       | 81.2 <sub>0.0216</sub>       |
|      | MT                     | 70 <sub>0.0125</sub>         | 56.2 <sub>0.025</sub>        | 58.3 <sub>0.0144</sub>       | 56.7 <sub>0.0361</sub>       | 70.8 <sub>0.0191</sub>       |
|      | MI                     | 28.7 <sub>0.0125</sub>       | 45 <sub>0.0433</sub>         | 26.2 <sub>0</sub>            | 60.4 <sub>0.0361</sub>       | 66.7 <sub>0.0473</sub>       |
|      | CT                     | 41.7 <sub>0.2886</sub>       | 47.1 <sub>0.2093</sub>       | 12.1 <sub>0.0505</sub>       | 95.8 <sub>0.0191</sub>       | 77.1 <sub>0.0315</sub>       |
|      | <b>Avg</b>             | <b>46.4<sub>0.0733</sub></b> | <b>54.5<sub>0.0894</sub></b> | <b>36.1<sub>0.0333</sub></b> | <b>73.5<sub>0.0283</sub></b> | <b>73.7<sub>0.0302</sub></b> |
| FOL  | EI                     | 100 <sub>0</sub>             | 95 <sub>0.0433</sub>         | 99.2 <sub>0.0144</sub>       | 93.3 <sub>0.0577</sub>       | 94.2 <sub>0.0288</sub>       |
|      | UI                     | 91.7 <sub>0.0288</sub>       | 86.7 <sub>0.0144</sub>       | 79.2 <sub>0.0288</sub>       | 92.5 <sub>0.025</sub>        | 89.2 <sub>0.0144</sub>       |
|      | MP                     | 89.6 <sub>0.0072</sub>       | 86.2 <sub>0.0216</sub>       | 73.3 <sub>0.0144</sub>       | 81.7 <sub>0.0144</sub>       | 85 <sub>0.0216</sub>         |
|      | HS                     | 74.2 <sub>0.0072</sub>       | 76.7 <sub>0.0072</sub>       | 84.2 <sub>0.0382</sub>       | 90.4 <sub>0.0260</sub>       | 77.5 <sub>0.0216</sub>       |
|      | DS                     | 51.7 <sub>0.1993</sub>       | 61.3 <sub>0.0331</sub>       | 76.7 <sub>0.0144</sub>       | 82.9 <sub>0.0382</sub>       | 89.6 <sub>0.0072</sub>       |
|      | CD                     | 33.3 <sub>0.0382</sub>       | 73.8 <sub>0.3473</sub>       | 15.8 <sub>0.0402</sub>       | 83.8 <sub>0.0451</sub>       | 92.1 <sub>0.0191</sub>       |
|      | DD                     | 55 <sub>0.05</sub>           | 40.4 <sub>0.0260</sub>       | 4.2 <sub>0.0260</sub>        | 75 <sub>0.0125</sub>         | 54.2 <sub>0.0591</sub>       |
|      | BD                     | 25.8 <sub>0.0144</sub>       | 64.2 <sub>0.3068</sub>       | 5.8 <sub>0.0260</sub>        | 77.9 <sub>0.0191</sub>       | 87.1 <sub>0.0439</sub>       |
| MT   | 73.3 <sub>0.0144</sub> | 62.5 <sub>0.0451</sub>       | 54.2 <sub>0.0072</sub>       | 67.9 <sub>0.0402</sub>       | 70 <sub>0.0866</sub>         |                              |
|      | <b>Avg</b>             | <b>66.1<sub>0.0399</sub></b> | <b>71.9<sub>0.0939</sub></b> | <b>54.7<sub>0.0233</sub></b> | <b>82.8<sub>0.0309</sub></b> | <b>82.1<sub>0.0336</sub></b> |
| NM   | DRI                    | 60 <sub>0.025</sub>          | 53.3 <sub>0.0803</sub>       | 56.7 <sub>0.0382</sub>       | 83.3 <sub>0.0144</sub>       | 80.8 <sub>0.0288</sub>       |
|      | DRS                    | 48.3 <sub>0.0072</sub>       | 37.1 <sub>0.0520</sub>       | 50 <sub>0.0451</sub>         | 64.2 <sub>0.0402</sub>       | 66.7 <sub>0.0144</sub>       |
|      | DRD                    | 95 <sub>0</sub>              | 79.2 <sub>0.0946</sub>       | 71.7 <sub>0.0722</sub>       | 90.8 <sub>0.0382</sub>       | 89.2 <sub>0.0144</sub>       |
|      | DRO                    | 41.7 <sub>0.0382</sub>       | 44.2 <sub>0.0764</sub>       | 54.2 <sub>0.0144</sub>       | 73.3 <sub>0.0382</sub>       | 76.7 <sub>0.1665</sub>       |
|      | RE1                    | 55.8 <sub>0.0617</sub>       | 41.7 <sub>0.0260</sub>       | 75 <sub>0.0125</sub>         | 72.5 <sub>0.025</sub>        | 60.4 <sub>0.0732</sub>       |
|      | RE2                    | 100 <sub>0</sub>             | 95.8 <sub>0.0382</sub>       | 54.2 <sub>0.1377</sub>       | 50 <sub>0</sub>              | 63.3 <sub>0.1010</sub>       |
|      | RE3                    | 64.2 <sub>0.0289</sub>       | 61.7 <sub>0.0722</sub>       | 79.2 <sub>0.0144</sub>       | 71.7 <sub>0.0144</sub>       | 72.5 <sub>0.05</sub>         |
|      | RAP                    | 65.4 <sub>0.0473</sub>       | 82.9 <sub>0.0144</sub>       | 67.5 <sub>0.0545</sub>       | 61.7 <sub>0.0072</sub>       | 64.2 <sub>0.0260</sub>       |
|      | <b>Avg</b>             | <b>66.3<sub>0.0260</sub></b> | <b>62<sub>0.0568</sub></b>   | <b>63.5<sub>0.0486</sub></b> | <b>70.9<sub>0.0222</sub></b> | <b>71.7<sub>0.0593</sub></b> |

Table 10: Average and standard deviation across three different prompts corresponding to each inference rule for Table 5 (main paper).

| Type | Axiom      | FLAN-T5     |             | Tk-instruct |             | UnifiedQA   |             | GPT-3       |             | ChatGPT     |             |
|------|------------|-------------|-------------|-------------|-------------|-------------|-------------|-------------|-------------|-------------|-------------|
|      |            | $A(No)$     | $A(Yes)$    | $A(No)$     | $A(Yes)$    | $A(No)$     | $A(Yes)$    | $A(No)$     | $A(Yes)$    | $A(No)$     | $A(Yes)$    |
| PL   | HS         | 100         | 50.0        | 100         | 100         | 100         | 34.5        | 98.1        | 70.4        | 100         | 66.6        |
|      | DS         | 66.6        | 0           | 72.9        | 10.0        | 80.0        | 25.3        | 77.7        | 30.8        | 66.6        | 0           |
|      | CD         | 87.7        | 56.5        | 75.9        | 100         | 0           | 0           | 96.7        | 94.7        | 76.8        | 29.2        |
|      | DD         | 75.0        | 0           | 75.0        | 0           | 90.0        | 0           | 100         | 47.6        | 77.7        | 30.8        |
|      | BD         | 90.6        | 87.5        | 85.7        | 100         | 0           | 0           | 98.2        | 76.0        | 88.5        | 50          |
|      | MT         | 84.1        | 36.1        | 66.6        | 0           | 77.9        | 100         | 94.3        | 40.0        | 82.6        | 35.3        |
|      | MI         | 56.3        | 20.3        | 68.3        | 5.0         | 75.0        | 25.0        | 76.2        | 26.3        | 83.8        | 32.6        |
|      | CT         | 81.2        | 63.6        | 75.0        | 0           | 0           | 0           | 100         | 95.2        | 98.1        | 70.4        |
|      | <b>Avg</b> | <b>80.2</b> | <b>39.2</b> | <b>77.4</b> | <b>39.4</b> | <b>52.8</b> | <b>23.1</b> | <b>92.6</b> | <b>60.1</b> | <b>84.3</b> | <b>39.4</b> |
| FOL  | EI         | 100         | 100         | 95.2        | 100         | 100         | 83.3        | 100         | 100         | 83.3        | 100         |
|      | UI         | 100         | 71.4        | 94.7        | 90.5        | 51.3        | 100         | 90.9        | 100         | 83.3        | 100         |
|      | MP         | 97.6        | 78.9        | 76.5        | 100         | 79.6        | 90.5        | 82.8        | 95.4        | 91.3        | 79.4        |
|      | HS         | 100         | 48.8        | 100         | 90.9        | 100         | 76.9        | 98.2        | 76.0        | 97.9        | 59.4        |
|      | DS         | 75.0        | 25.0        | 75.0        | 0           | 96.6        | 85.7        | 100         | 57.1        | 84.5        | 100         |
|      | CD         | 78.6        | 80.0        | 75.9        | 100         | 85.7        | 0           | 100         | 100         | 76.0        | 40.0        |
|      | DD         | 77.0        | 50.0        | 75.0        | 0           | 68.4        | 0           | 100         | 37.0        | 88.4        | 40.5        |
|      | BD         | 83.3        | 100         | 75.0        | 0           | 50.0        | 23.6        | 100         | 74.1        | 94.2        | 60.7        |
| MT   | 95.3       | 48.6        | 68.3        | 5.0         | 75.0        | 0           | 100         | 47.6        | 95.7        | 54.5        |             |
|      | <b>Avg</b> | <b>89.6</b> | <b>67.0</b> | <b>81.7</b> | <b>54.0</b> | <b>78.5</b> | <b>51.1</b> | <b>96.9</b> | <b>76.3</b> | <b>88.3</b> | <b>70.5</b> |
| NM   | DRI        | 50.0        | 50.0        | 64.5        | 100         | 50.0        | 0           | 72.2        | 68.2        | 69.2        | 85.7        |
|      | DRS        | 67.2        | 4.5         | 74.7        | 0           | 75.0        | 0           | 63.0        | 0           | 74.0        | 0           |
|      | DRD        | 100         | 95.2        | 80.0        | 100         | 83.3        | 100         | 100         | 100         | 80.0        | 100         |
|      | DRO        | 40.0        | 40.0        | 50.0        | 0           | 50.0        | 0           | 100         | 90.9        | 74.1        | 100         |
|      | RE1        | 76.9        | 28.6        | 74.7        | 0           | 75.0        | 0           | 97.7        | 51.3        | 80.3        | 66.6        |
|      | RE2        | 100         | 100         | 52.6        | 100         | 50.0        | 0           | 100         | 100         | 55.5        | 100         |
|      | RE3        | 72.2        | 68.2        | 79.2        | 93.8        | 54.1        | 100         | 69.2        | 85.7        | 62.1        | 81.8        |
|      | RAP        | 56.8        | 55.8        | 52.6        | 100         | 50.0        | 0           | 86.8        | 83.3        | 70.2        | 100         |
|      | <b>Avg</b> | <b>70.4</b> | <b>55.3</b> | <b>66.0</b> | <b>61.7</b> | <b>60.9</b> | <b>25.0</b> | <b>86.1</b> | <b>72.4</b> | <b>70.7</b> | <b>79.3</b> |

Table 11: Performance of LLMs in few-shot setting in terms of label-wise accuracy on LogicBench(Eval), where  $A(Yes)$  and  $A(No)$  denote the accuracy for the  $Yes$  and  $No$  labels, respectively.



## References

- 219 [1] Jean-Philippe Bernardy and Stergios Chatzikiyriakidis. Fracas: Temporal analysis, 2020.
- 220 [2] Xiang Chen, Xin Xie, Ningyu Zhang, Jiahuan Yan, Shumin Deng, Chuanqi Tan, Fei Huang, Luo  
221 Si, and Huajun Chen. Adaprompt: Adaptive prompt-based finetuning for relation extraction.  
222 *arXiv e-prints*, pages arXiv–2104, 2021.
- 223 [3] Leyang Cui, Yu Wu, Jian Liu, Sen Yang, and Yue Zhang. Template-based named entity  
224 recognition using bart. *arXiv preprint arXiv:2106.01760*, 2021.
- 225 [4] Dheeru Dua, Yizhong Wang, Pradeep Dasigi, Gabriel Stanovsky, Sameer Singh, and Matt  
226 Gardner. DROP: A reading comprehension benchmark requiring discrete reasoning over  
227 paragraphs. In *Proceedings of the 2019 Conference of the North American Chapter of the*  
228 *Association for Computational Linguistics: Human Language Technologies, Volume 1 (Long*  
229 *and Short Papers)*, pages 2368–2378, Minneapolis, Minnesota, June 2019. Association for  
230 Computational Linguistics.
- 231 [5] Avia Efrat and Omer Levy. The turking test: Can language models understand instructions?  
232 *arXiv preprint arXiv:2010.11982*, 2020.
- 233 [6] Himanshu Gupta, Neeraj Varshney, Swaroop Mishra, Kuntal Kumar Pal, Saurabh Arjun Sawant,  
234 Kevin Scaria, Siddharth Goyal, and Chitta Baral. "john is 50 years old, can his son be 65?"  
235 evaluating nlp models' understanding of feasibility. *arXiv preprint arXiv:2210.07471*, 2022.
- 236 [7] Tanmay Gupta, Amita Kamath, Aniruddha Kembhavi, and Derek Hoiem. Towards general  
237 purpose vision systems. *arXiv preprint arXiv:2104.00743*, 2021.
- 238 [8] Peter Hase and Mohit Bansal. When can models learn from explanations? a formal framework  
239 for understanding the roles of explanation data. *arXiv preprint arXiv:2102.02201*, 2021.
- 240 [9] Zhengbao Jiang, Frank F Xu, Jun Araki, and Graham Neubig. How can we know what language  
241 models know? *Transactions of the Association for Computational Linguistics*, 8:423–438,  
242 2020.
- 243 [10] Daniel Khashabi, Sewon Min, Tushar Khot, Ashish Sabharwal, Oyvind Tafjord, Peter Clark,  
244 and Hannaneh Hajishirzi. UNIFIEDQA: Crossing format boundaries with a single QA system.  
245 In *Findings of the Association for Computational Linguistics: EMNLP 2020*, pages 1896–1907,  
246 Online, November 2020. Association for Computational Linguistics.
- 247 [11] Kirby Kuznia, Swaroop Mishra, Mihir Parmar, and Chitta Baral. Less is more: Summary of  
248 long instructions is better for program synthesis. In *Proceedings of the 2022 Conference on*  
249 *Empirical Methods in Natural Language Processing*, pages 4532–4552, Abu Dhabi, United  
250 Arab Emirates, December 2022. Association for Computational Linguistics.
- 251 [12] Teven Le Scao and Alexander M Rush. How many data points is a prompt worth? In *Proceedings*  
252 *of the 2021 Conference of the North American Chapter of the Association for Computational*  
253 *Linguistics: Human Language Technologies*, pages 2627–2636, 2021.
- 254 [13] Hector J. Levesque, Ernest Davis, and Leora Morgenstern. The Winograd Schema Chal-  
255 lenge. In *Proceedings of the Thirteenth International Conference on Principles of Knowledge*  
256 *Representation and Reasoning, KR'12*, pages 552–561. AAAI Press, Rome, Italy, 2012.
- 257 [14] Xi Victoria Lin, Todor Mihaylov, Mikel Artetxe, Tianlu Wang, Shuohui Chen, Daniel Simig,  
258 Myle Ott, Naman Goyal, Shruti Bhosale, Jingfei Du, et al. Few-shot learning with multilingual  
259 language models. *arXiv preprint arXiv:2112.10668*, 2021.
- 260 [15] Pengfei Liu, Weizhe Yuan, Jinlan Fu, Zhengbao Jiang, Hiroaki Hayashi, and Graham Neubig.  
261 Pre-train, prompt, and predict: A systematic survey of prompting methods in natural language  
262 processing. *arXiv preprint arXiv:2107.13586*, 2021.
- 263

- 264 [16] Yao Lu, Max Bartolo, Alastair Moore, Sebastian Riedel, and Pontus Stenetorp. Fantastically  
265 ordered prompts and where to find them: Overcoming few-shot prompt order sensitivity. In  
266 *Proceedings of the 60th Annual Meeting of the Association for Computational Linguistics*  
267 (*Volume 1: Long Papers*), pages 8086–8098, Dublin, Ireland, May 2022. Association for  
268 Computational Linguistics.
- 269 [17] Man Luo, Sharad Saxena, Swaroop Mishra, Mihir Parmar, and Chitta Baral. Biotabqa: In-  
270 struction learning for biomedical table question answering. *arXiv preprint arXiv:2207.02419*,  
271 2022.
- 272 [18] Marco Marelli, Stefano Menini, Marco Baroni, Luisa Bentivogli, Raffaella Bernardi, and  
273 Roberto Zamparelli. The SICK (Sentences Involving Compositional Knowledge) dataset for  
274 relatedness and entailment, May 2014.
- 275 [19] R. Thomas McCoy, Ellie Pavlick, and Tal Linzen. Right for the wrong reasons: Diagnosing  
276 syntactic heuristics in natural language inference, 2019.
- 277 [20] Sewon Min, Mike Lewis, Luke Zettlemoyer, and Hannaneh Hajishirzi. Metaicl: Learning to  
278 learn in context. *arXiv preprint arXiv:2110.15943*, 2021.
- 279 [21] Swaroop Mishra, Daniel Khashabi, Chitta Baral, Yejin Choi, and Hannaneh Hajishirzi. Refram-  
280 ing instructional prompts to gptk’s language. *arXiv preprint arXiv:2109.07830*, 2021.
- 281 [22] Swaroop Mishra, Daniel Khashabi, Chitta Baral, and Hannaneh Hajishirzi. Cross-task gener-  
282 alization via natural language crowdsourcing instructions. *arXiv preprint arXiv:2104.08773*,  
283 2021.
- 284 [23] Swaroop Mishra, Arindam Mitra, Neeraj Varshney, Bhavdeep Sachdeva, Peter Clark, Chitta  
285 Baral, and Ashwin Kalyan. NumGLUE: A suite of fundamental yet challenging mathematical  
286 reasoning tasks. In *Proceedings of the 60th Annual Meeting of the Association for Computational*  
287 *Linguistics (Volume 1: Long Papers)*, pages 3505–3523, Dublin, Ireland, May 2022. Association  
288 for Computational Linguistics.
- 289 [24] Swaroop Mishra and Elnaz Nouri. Help me think: A simple prompting strategy for non-experts  
290 to create customized content with models. *arXiv preprint arXiv:2208.08232*, 2022.
- 291 [25] Long Ouyang, Jeff Wu, Xu Jiang, Diogo Almeida, Carroll L Wainwright, Pamela Mishkin,  
292 Chong Zhang, Sandhini Agarwal, Katarina Slama, Alex Ray, et al. Training language models to  
293 follow instructions with human feedback. *arXiv preprint arXiv:2203.02155*, 2022.
- 294 [26] Mihir Parmar, Swaroop Mishra, Mirali Purohit, Man Luo, Murad Mohammad, and Chitta  
295 Baral. In-BoXBART: Get instructions into biomedical multi-task learning. In *Findings of*  
296 *the Association for Computational Linguistics: NAACL 2022*, pages 112–128, Seattle, United  
297 States, July 2022. Association for Computational Linguistics.
- 298 [27] Arkil Patel, Satwik Bhattamishra, and Navin Goyal. Are NLP models really able to solve  
299 simple math word problems? In *Proceedings of the 2021 Conference of the North American*  
300 *Chapter of the Association for Computational Linguistics: Human Language Technologies*,  
301 pages 2080–2094, Online, June 2021. Association for Computational Linguistics.
- 302 [28] Pruthvi Patel, Swaroop Mishra, Mihir Parmar, and Chitta Baral. Is a question decomposition  
303 unit all we need? In *Proceedings of the 2022 Conference on Empirical Methods in Natural*  
304 *Language Processing*, pages 4553–4569, Abu Dhabi, United Arab Emirates, December 2022.  
305 Association for Computational Linguistics.
- 306 [29] Keisuke Sakaguchi, Ronan Le Bras, Chandra Bhagavatula, and Yejin Choi. Winogrande: An  
307 adversarial winograd schema challenge at scale. *Communications of the ACM*, 64(9):99–106,  
308 2021.

- 309 [30] Victor Sanh, Albert Webson, Colin Raffel, Stephen H Bach, Lintang Sutawika, Zaid Alyafeai,  
310 Antoine Chaffin, Arnaud Stiegler, Teven Le Scao, Arun Raja, et al. Multitask prompted training  
311 enables zero-shot task generalization. *ICLR*, 2021.
- 312 [31] Timo Schick and Hinrich Schütze. Exploiting cloze questions for few shot text classification  
313 and natural language inference. *arXiv preprint arXiv:2001.07676*, 2020.
- 314 [32] Oyvind Tafjord, Peter Clark, Matt Gardner, Wen-tau Yih, and Ashish Sabharwal. Quarel: A  
315 dataset and models for answering questions about qualitative relationships. In *Proceedings of  
316 the AAAI Conference on Artificial Intelligence*, volume 33, pages 7063–7071, 2019.
- 317 [33] Oyvind Tafjord, Matt Gardner, Kevin Lin, and Peter Clark. QuaRTz: An open-domain dataset  
318 of qualitative relationship questions. In *Proceedings of the 2019 Conference on Empirical  
319 Methods in Natural Language Processing and the 9th International Joint Conference on Natural  
320 Language Processing (EMNLP-IJCNLP)*, pages 5941–5946, Hong Kong, China, November  
321 2019. Association for Computational Linguistics.
- 322 [34] Alon Talmor, Jonathan Herzig, Nicholas Lourie, and Jonathan Berant. CommonsenseQA:  
323 A question answering challenge targeting commonsense knowledge. In *Proceedings of the  
324 2019 Conference of the North American Chapter of the Association for Computational Linguistics: Human Language Technologies, Volume 1 (Long and Short Papers)*, pages 4149–4158,  
325 Minneapolis, Minnesota, June 2019. Association for Computational Linguistics.
- 327 [35] Bertie Vidgen, Dong Nguyen, Helen Margetts, Patricia Rossini, and Rebekah Tromble. Cad:  
328 the contextual abuse dataset, May 2021.
- 329 [36] Liwen Wang, Rumei Li, Yang Yan, Yuanmeng Yan, Sirui Wang, Wei Wu, and Weiran Xu.  
330 Instructioner: A multi-task instruction-based generative framework for few-shot ner. *arXiv  
331 preprint arXiv:2203.03903*, 2022.
- 332 [37] Yizhong Wang, Swaroop Mishra, Pegah Alipoormolabashi, Yeganeh Kordi, Amirreza Mirzaei,  
333 Atharva Naik, Arjun Ashok, Arut Selvan Dhanasekaran, Anjana Arunkumar, David Stap, Eshaan  
334 Pathak, Giannis Karamanolakis, Haizhi Lai, Ishan Purohit, Ishani Mondal, Jacob Anderson,  
335 Kirby Kuznia, Krима Doshi, Kuntal Kumar Pal, Maitreya Patel, Mehrad Moradshahi, Mihir  
336 Parmar, Mirali Purohit, Neeraj Varshney, Phani Rohitha Kaza, Pulkit Verma, Ravsehaj Singh  
337 Puri, Rushang Karia, Savan Doshi, Shailaja Keyur Sampat, Siddhartha Mishra, Sujan Reddy A,  
338 Sumanta Patro, Tanay Dixit, and Xudong Shen. Super-NaturalInstructions: Generalization  
339 via declarative instructions on 1600+ NLP tasks. In *Proceedings of the 2022 Conference on  
340 Empirical Methods in Natural Language Processing*, pages 5085–5109, Abu Dhabi, United  
341 Arab Emirates, December 2022. Association for Computational Linguistics.
- 342 [38] Jason Wei, Maarten Bosma, Vincent Y Zhao, Kelvin Guu, Adams Wei Yu, Brian Lester, Nan  
343 Du, Andrew M Dai, and Quoc V Le. Finetuned language models are zero-shot learners. *ICLR*,  
344 2021.
- 345 [39] Orion Weller, Nicholas Lourie, Matt Gardner, and Matthew E Peters. Learning from task  
346 descriptions. *arXiv preprint arXiv:2011.08115*, 2020.
- 347 [40] Tongshuang Wu, Michael Terry, and Carrie Jun Cai. Ai chains: Transparent and controllable  
348 human-ai interaction by chaining large language model prompts. In *Proceedings of the 2022  
349 CHI Conference on Human Factors in Computing Systems*, pages 1–22, 2022.
- 350 [41] Hitomi Yanaka, Koji Mineshima, Daisuke Bekki, Kentaro Inui, Satoshi Sekine, Lasha Abzian-  
351 idze, and Johan Bos. Can neural networks understand monotonicity reasoning?, 2019.
- 352 [42] Qinyuan Ye and Xiang Ren. Zero-shot learning by generating task-specific adapters. *arXiv  
353 e-prints*, pages arXiv–2101, 2021.

- 354 [43] Wenpeng Yin, Jamaal Hay, and Dan Roth. Benchmarking zero-shot text classification: Datasets,  
355 evaluation and entailment approach. *arXiv preprint arXiv:1909.00161*, 2019.
- 356 [44] Ruiqi Zhong, Kristy Lee, Zheng Zhang, and Dan Klein. Adapting language models for zero-shot  
357 learning by meta-tuning on dataset and prompt collections. *arXiv preprint arXiv:2104.04670*,  
358 2021.
- 359 [45] Ben Zhou, Daniel Khashabi, Qiang Ning, and Dan Roth. “going on a vacation” takes longer  
360 than “going for a walk”: A study of temporal commonsense understanding. In *Proceedings*  
361 *of the 2019 Conference on Empirical Methods in Natural Language Processing and the 9th*  
362 *International Joint Conference on Natural Language Processing (EMNLP-IJCNLP)*, pages  
363 3363–3369, Hong Kong, China, November 2019. Association for Computational Linguistics.
